# Supplementary material for: Faecal microbiota transplantation with anti-inflammatory diet (FMT-AID) followed by anti-inflammatory diet alone is effective in inducing and maintaining remission over 1 year in mild to moderate ulcerative colitis: a randomised controlled trial
Source: HighWire-hosted journal article supplement (doi:10.1136/gutjnl-2022-327811), 2022-08-16
Supplement: gutjnl-2022-327811supp006_data_supplement.pdf [file gutjnl-2022-327811supp006_data_supplement.pdf]

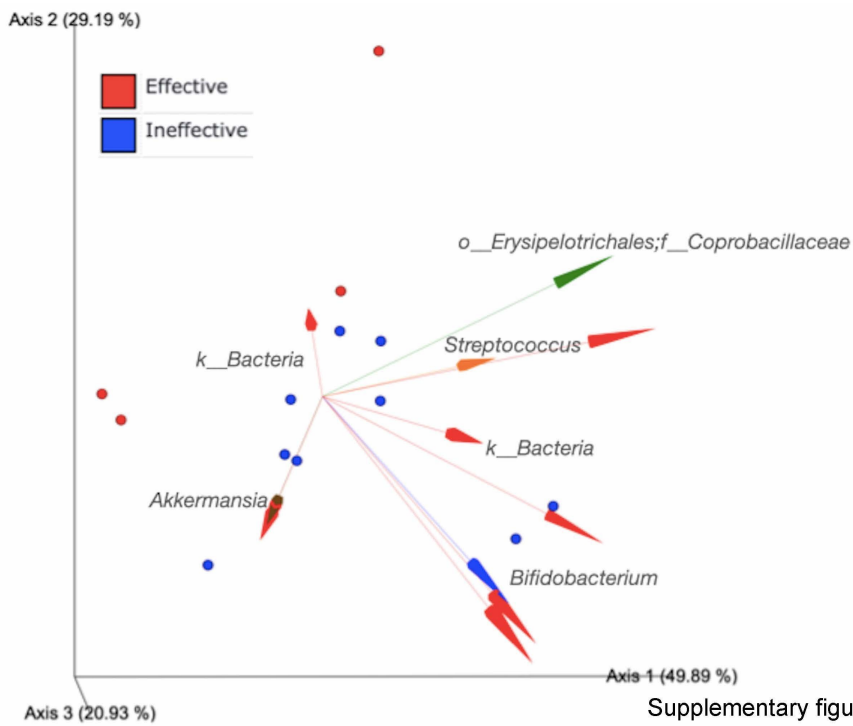

| PERMANOVA results      |           |
|------------------------|-----------|
| method name            | PERMANOVA |
| test statistic name    | pseudo-F  |
| sample size            | 13        |
| number of groups       | 2         |
| test statistic         | 2.66295   |
| p-value                | 0.04      |
| number of permutations | 999       |

Supplementary figure 3
