# Supplementary material for: Faecal microbiota transplantation with anti-inflammatory diet (FMT-AID) followed by anti-inflammatory diet alone is effective in inducing and maintaining remission over 1 year in mild to moderate ulcerative colitis: a randomised controlled trial
Source: HighWire-hosted journal article supplement (doi:10.1136/gutjnl-2022-327811), 2022-08-16
Supplement: gutjnl-2022-327811supp007_data_supplement.pdf [file gutjnl-2022-327811supp007_data_supplement.pdf]

Species

- [Eubacterium] eligens ATCC 27750
- [Ruminococcus] faecis JCM 15917
- aerofaciens
- anaerobia JC110
- bififormis
- butyriciproducens
- callidus
- catus
- confusa
- copri DSM 18205
- coprostanoligenes
- faecis
- formicilis
- hadrus
- hallii
- indica
- isoflavoniconvertens
- longicatena
- mitsuokai
- parainfluenzae ATCC 33392
- prausnitzii
- rectale ATCC 33656
- rogosae
- ruminis
- saccharivorans
- salivarius
- sanguinis
- timonensis
- NA

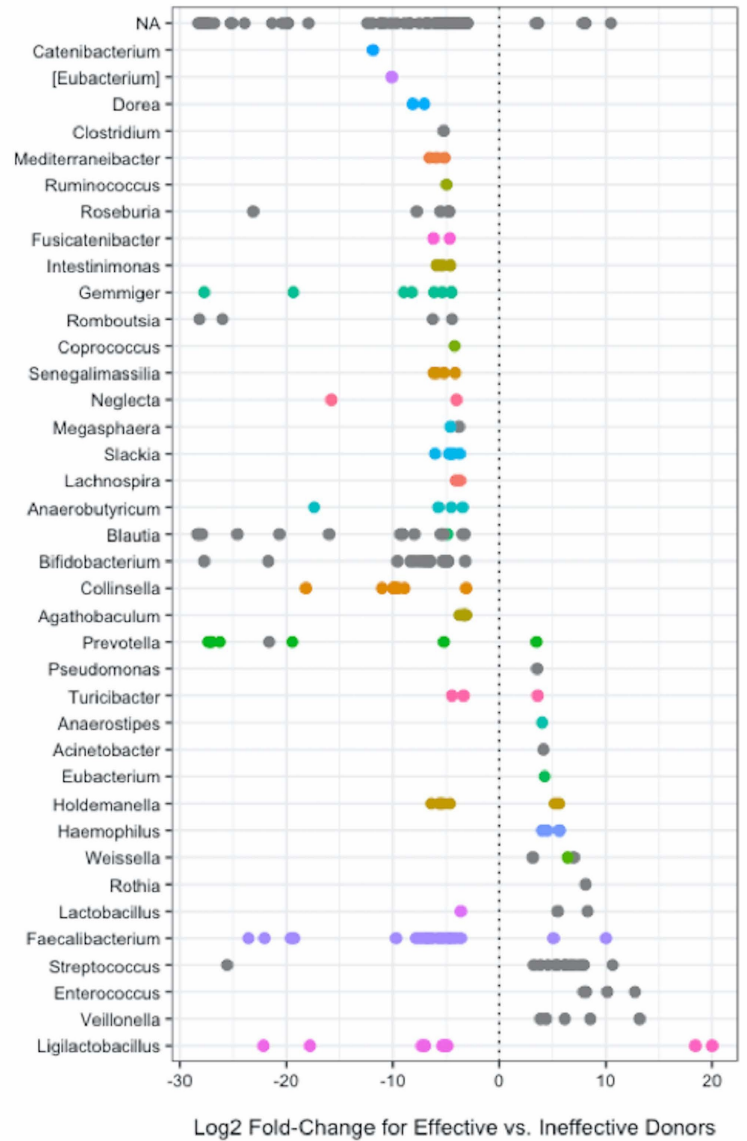

Supplementary figure 4
