# Supplementary figures and images for: Faecal microbiota transplantation with anti-inflammatory diet (FMT-AID) followed by anti-inflammatory diet alone is effective in inducing and maintaining remission over 1 year in mild to moderate ulcerative colitis: a randomised controlled trial
Source: HighWire-hosted journal article supplement (doi:10.1136/gutjnl-2022-327811), 2022-08-16

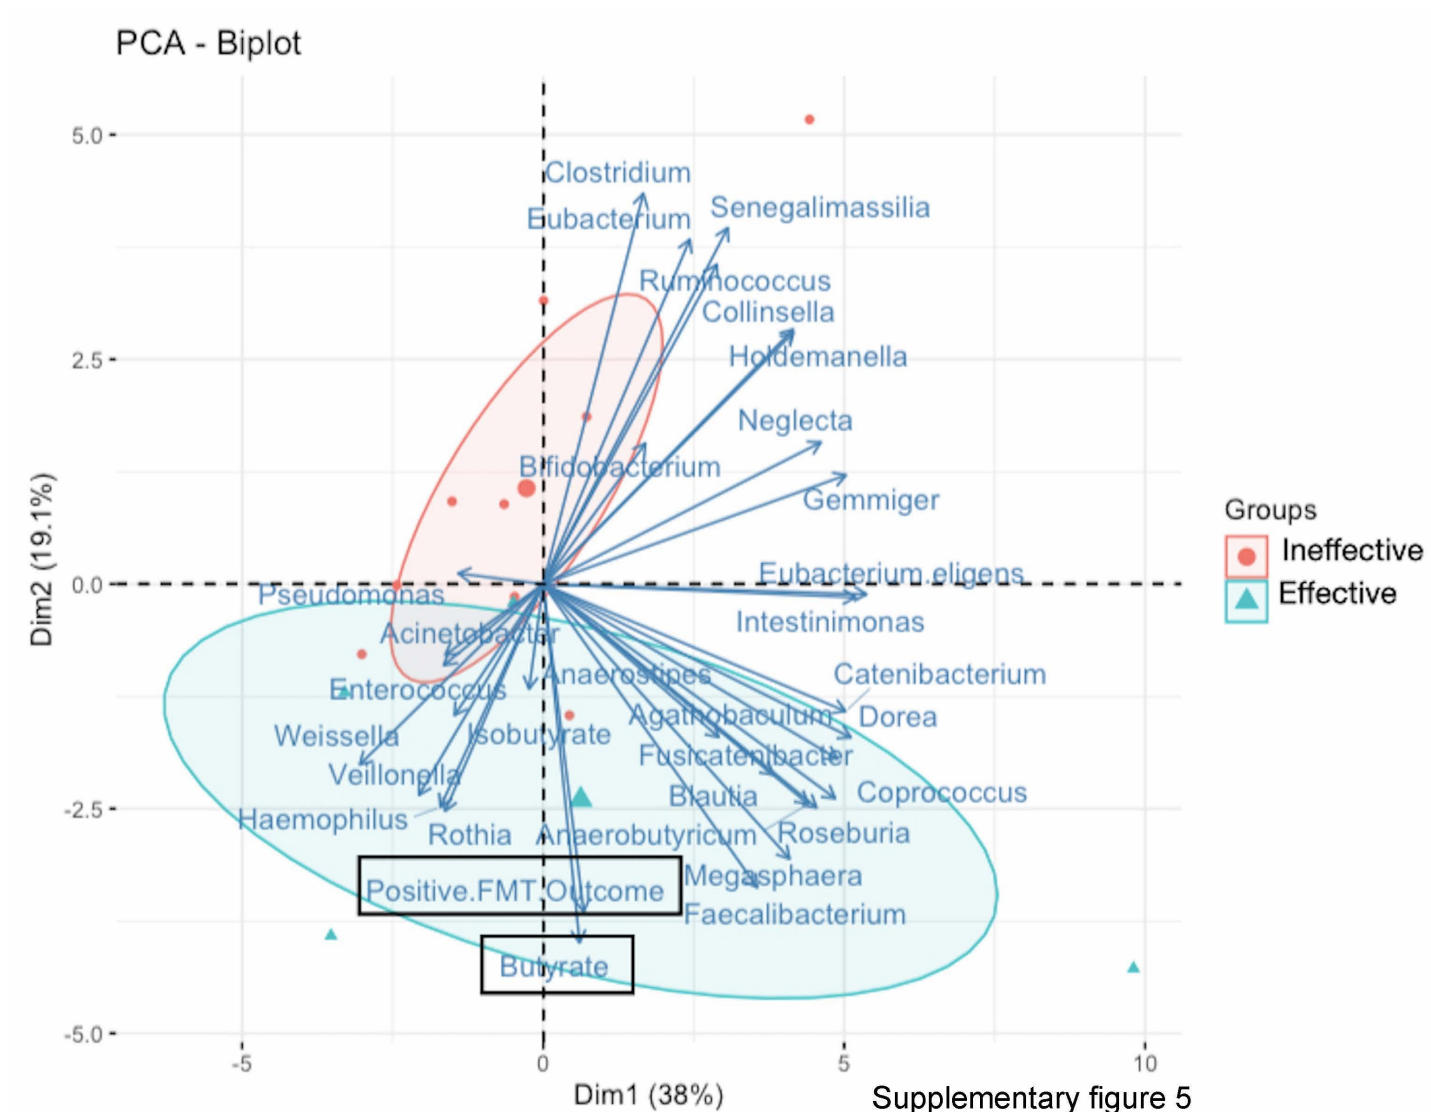

Supplement: gutjnl-2022-327811supp008_data_supplement.pdf [file gutjnl-2022-327811supp008_data_supplement.pdf]
